# Supplementary material for: Co-expression of Foxa.a, Foxd and Fgf9/16/20 defines a transient mesendoderm regulatory state in ascidian embryos
Source: eLife journal article supplement (doi:10.7554/elife.14692), 2016-06-28
Supplement: supp [file elife-14692-supp-v1.zip]

a) Percentage of embryos showing any level of *Fucosyltransferase-like* driven gene expression at various stages.

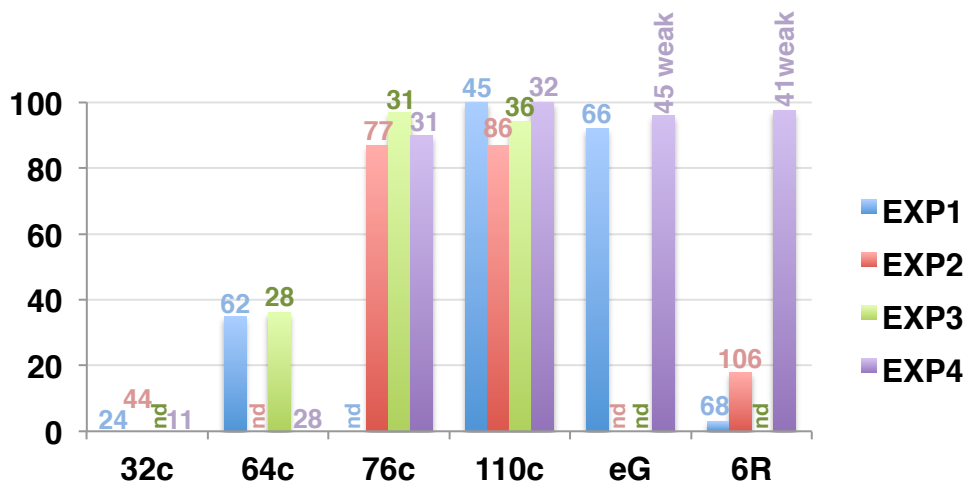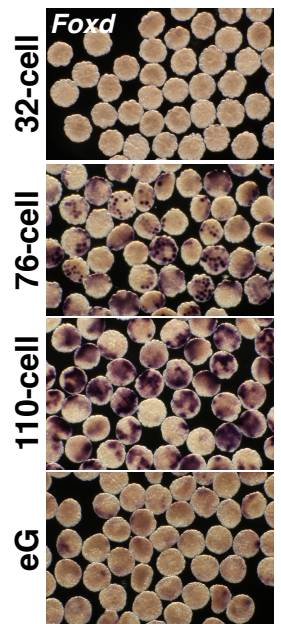

b) Percentage of embryos with  $\geq 50\%$  of control levels of ectoderm gene expression in control and FT>Foxa.a+Foxd+Fgf9/16/20 electroporated embryos at various stages.

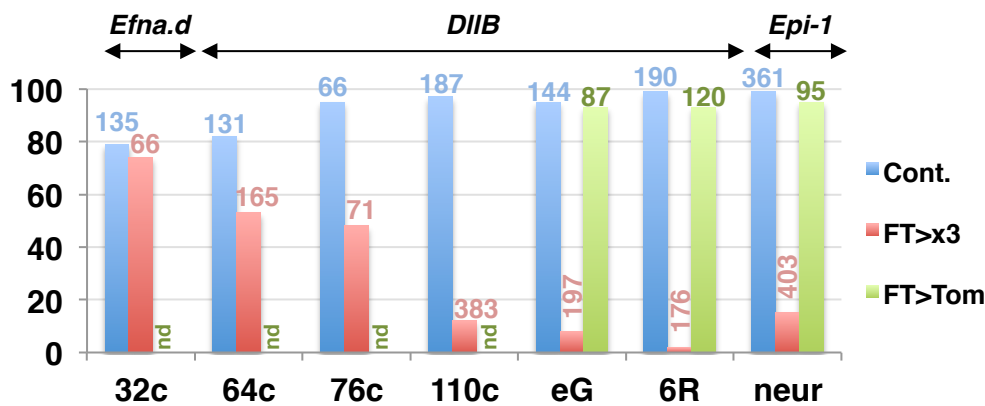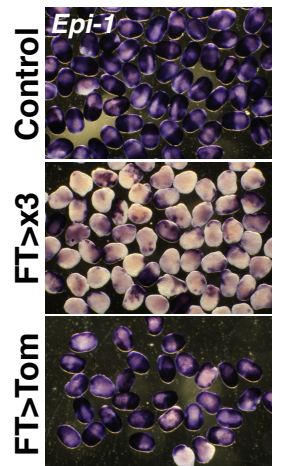

c) Percentage of embryos with any level of ectopic *Zic-r.b* expression in ectoderm lineage cells in control and FT>Foxa.a+Foxd+Fgf9/16/20 electroporated embryos at various stages.

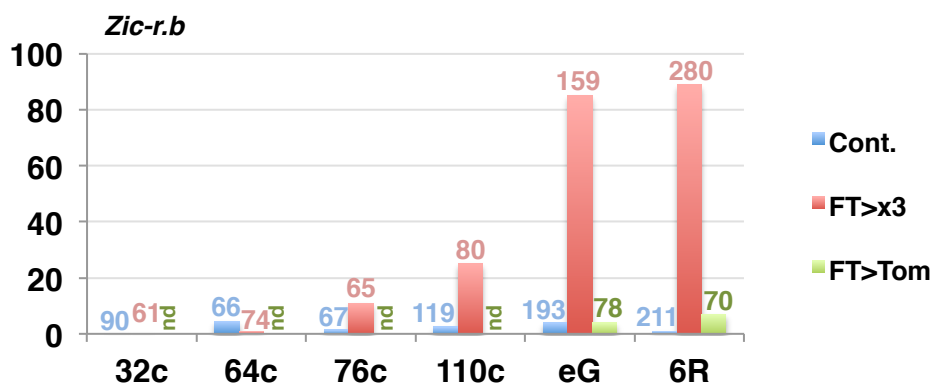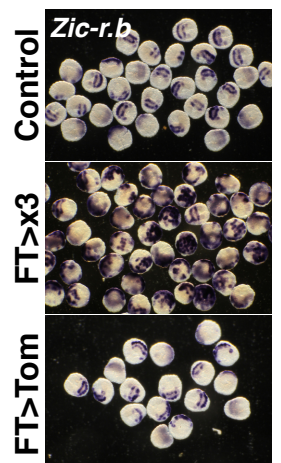

Figure 5 Supplement 1
