# Supplementary figures and images for: Co-expression of Foxa.a, Foxd and Fgf9/16/20 defines a transient mesendoderm regulatory state in ascidian embryos
Source: eLife journal article supplement (doi:10.7554/elife.14692), 2016-06-28

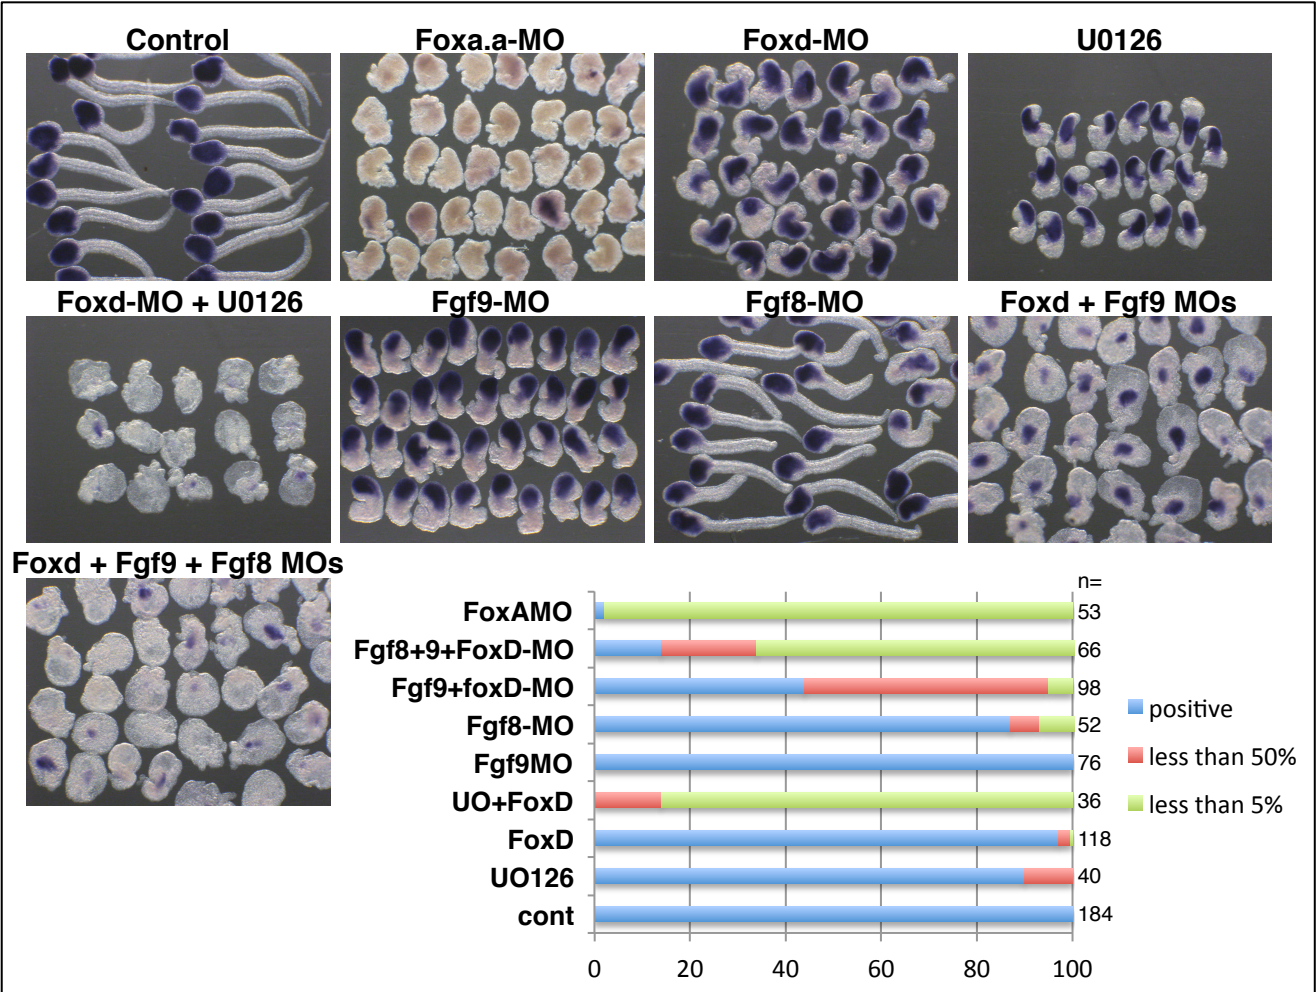

Figure 2 Supplement 2

Supplement: supp [file elife-14692-supp-v1.zip]

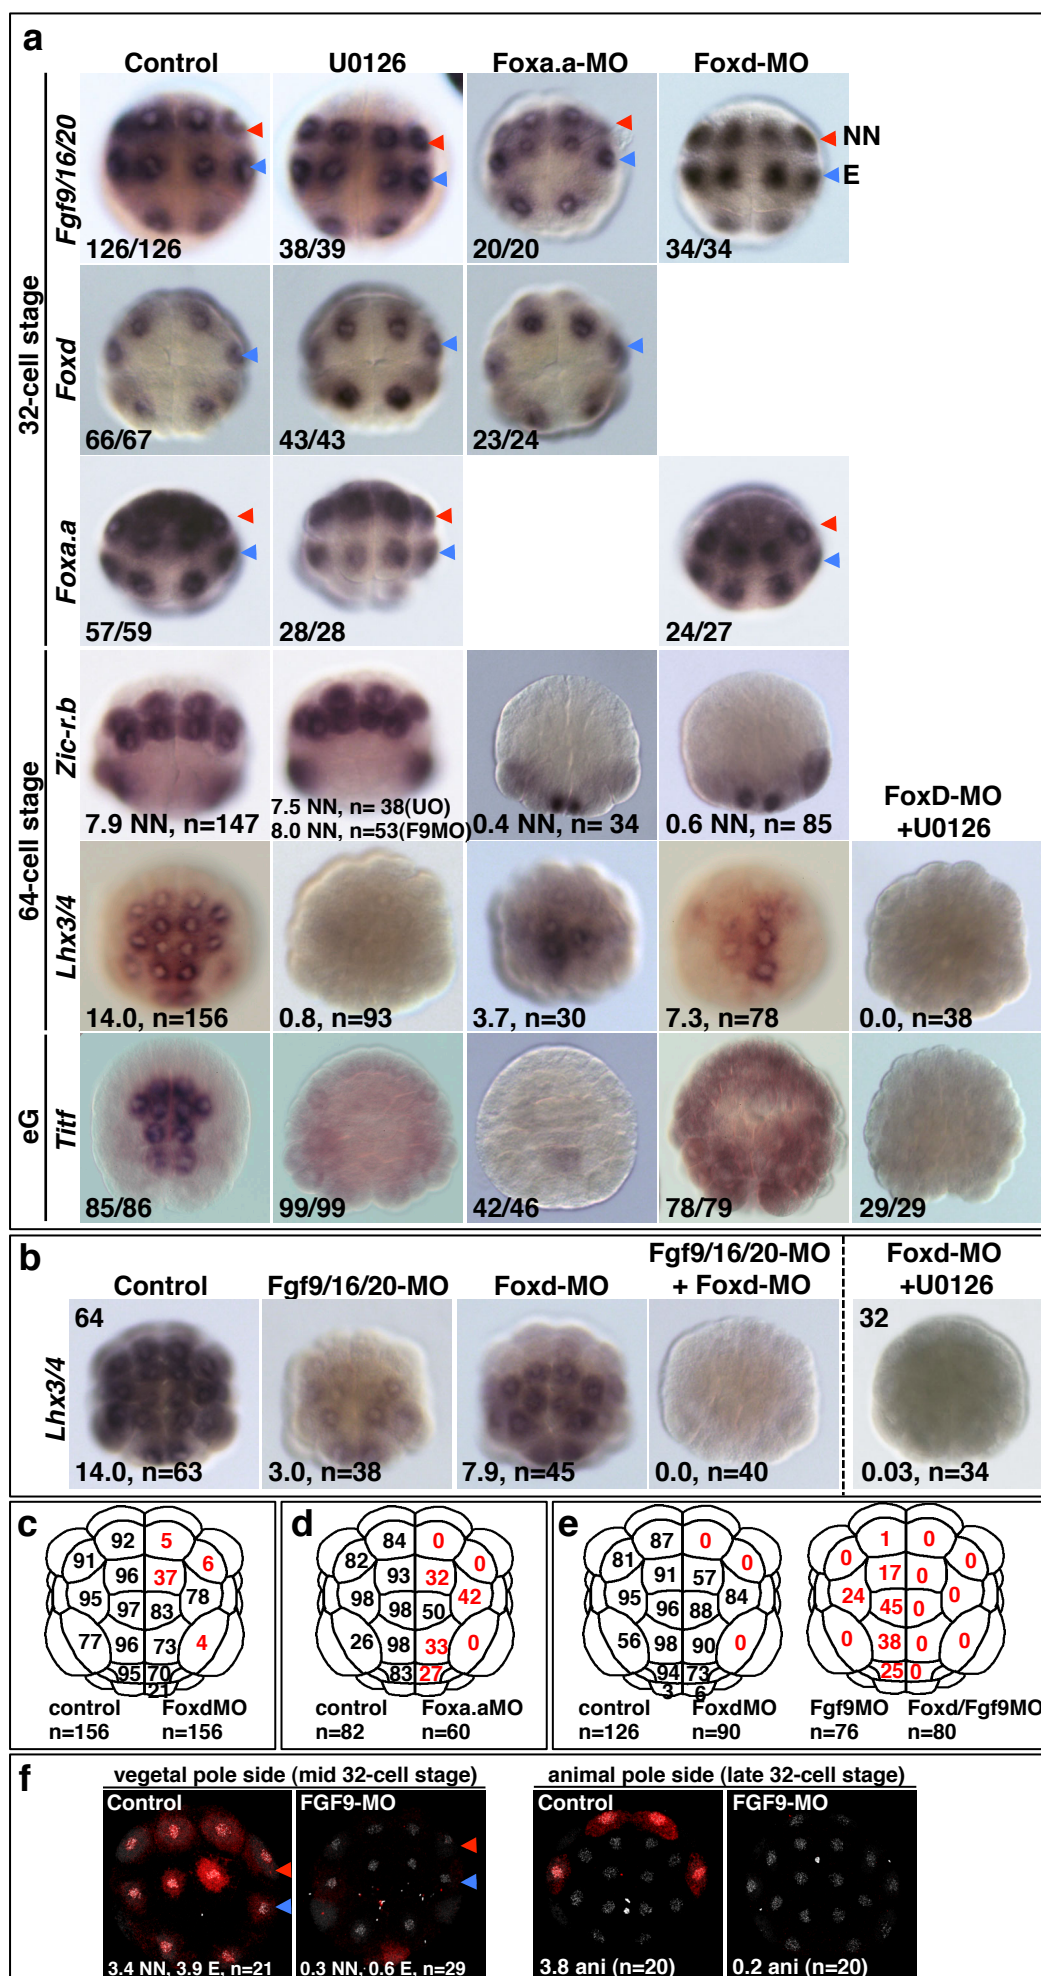

**Figure 2 Supplement 1**

Supplement: supp [file elife-14692-supp-v1.zip]

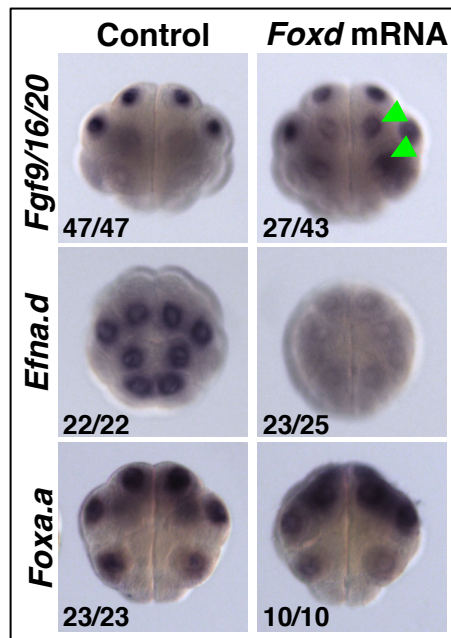

**Figure 3 Supplement 1**

Supplement: supp [file elife-14692-supp-v1.zip]

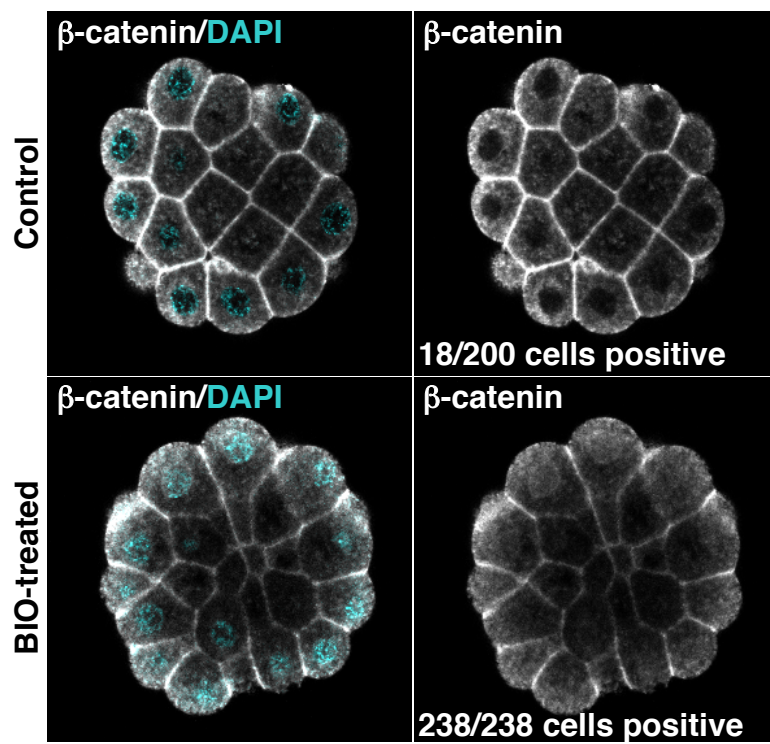

**Figure 5 Supplement 2**

Supplement: supp [file elife-14692-supp-v1.zip]
